# Supplementary material for: Effects of water on the stochastic motions of propane confined in MCM-41-S pores
Source: Royal Society of Chemistry journal article supplement (doi:10.1039/c9cp04741g), 2019-01-01
Supplement: c9cp04741g1.pdf [file c9cp04741g1.pdf]

## **Effects of Water on the Stochastic Motions of Propane Confined in MCM-41-S Pores**

Siddharth Gautam<sup>1\*</sup>, Tran Thi Bao Le<sup>2</sup>, Gernot Rother<sup>3</sup>, Niina Jalarvo<sup>4</sup>, Tingting Liu<sup>1</sup>,  
Eugene Mamontov<sup>4</sup>, Sheng Dai<sup>3</sup>, Zhen-An Qiao<sup>3</sup>, Alberto Striolo<sup>2</sup> and David Cole<sup>1</sup>

<sup>1</sup>School of Earth Sciences, The Ohio State University, 125 S Oval Mall, Columbus,  
43210, OH, United States of America

<sup>2</sup>Department of Chemical Engineering, University College London, London WC1E 6BT,  
United Kingdom

<sup>3</sup>Chemical Sciences Division, Oak Ridge National Laboratory, Oak Ridge, Tennessee  
37831, United States of America

<sup>4</sup>Neutron Science Directorate, Oak Ridge National Laboratory, Oak Ridge, Tennessee  
37831, United States of America

### **Supplementary Information**

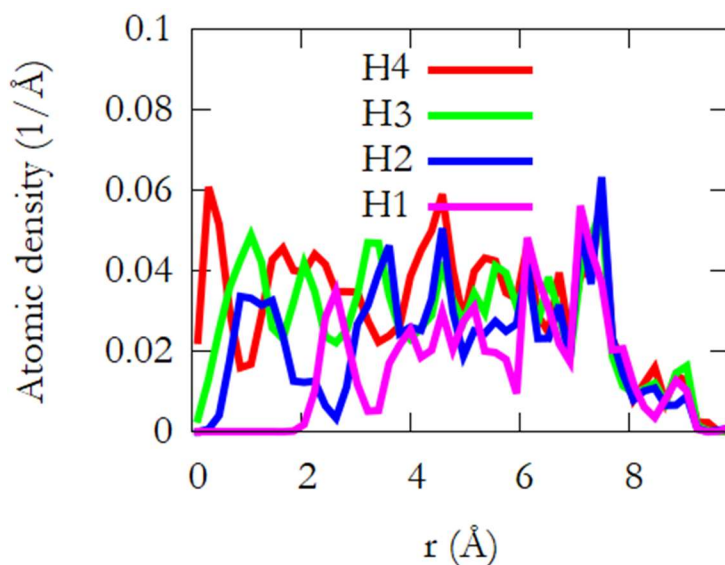

**Figure S1** Atomic density distribution of Oxygen atoms in water molecules in a model MCM-41-S pore along the radial directions. Lines with different colors represent different systems as tabulated in Table 1 of the main manuscript. H1 is the system with lowest water content while water content is progressively higher in the systems H2, H3 and H4.

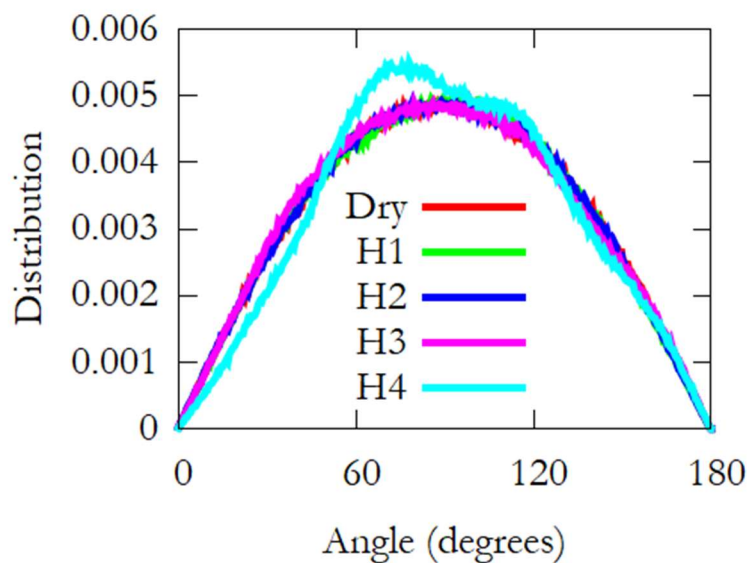

**Figure S2.** Distribution of the angles formed by the  $\text{CH}_3\text{-CH}_2$  vector of a propane molecule with the radial direction in the model MCM-41-S pore for different systems as tabulated in Table 1. The distribution deviates from isotropic at highest water content (H4).

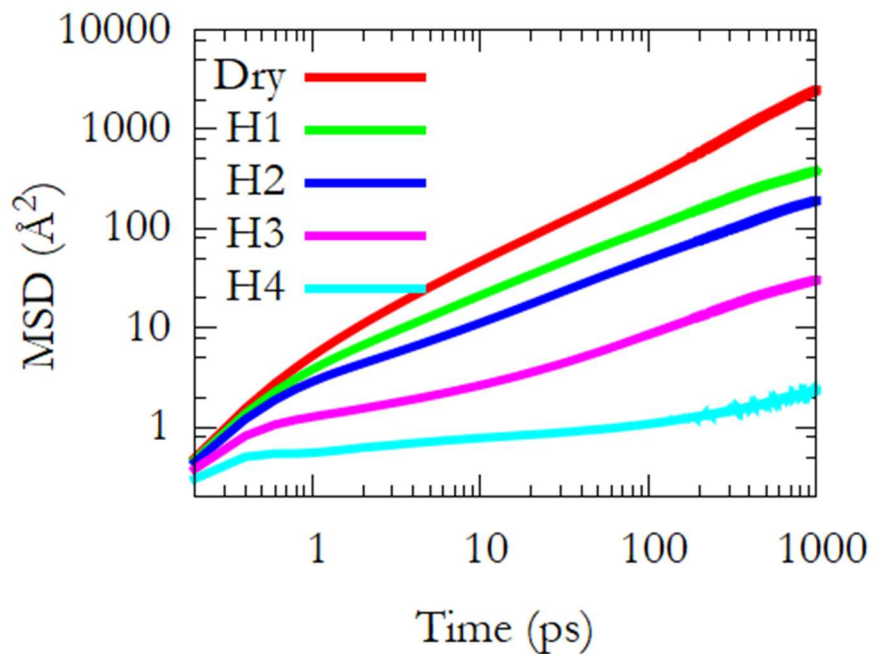

**Figure S3.** Mean squared displacement of the center of mass of propane molecules in model MCM-41-S pore with different moisture contents at 250 K.

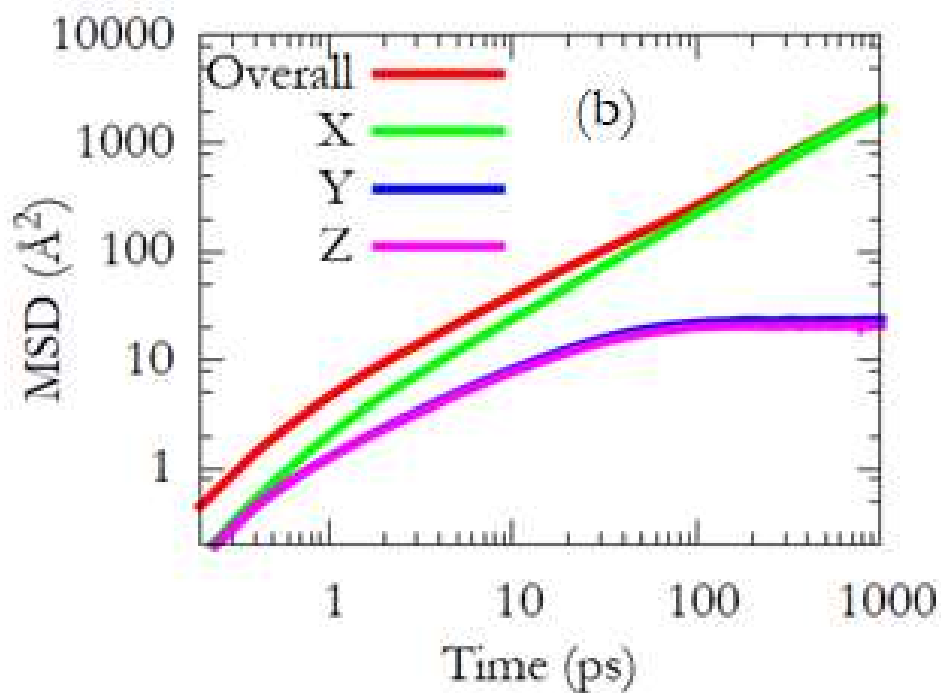

**Figure S4** MSD of the dry sample at 230 K resolved along different Cartesian directions.

**Table S1.** 1-dimensional diffusion coefficients of water in the systems listed in Table 1 of the main manuscript. For the system H4 mobility of water was severely restricted prohibiting an estimate of the diffusion coefficient.

| Sample | D ( $\times 10^{-10}$ m <sup>2</sup> /s) |                 |
|--------|------------------------------------------|-----------------|
|        | 230 K                                    | 250 K           |
| Dry    | N. A.                                    | N. A.           |
| H1     | 0.11 $\pm$ 0.02                          | 0.14 $\pm$ 0.02 |
| H2     | 0.10 $\pm$ 0.04                          | 0.12 $\pm$ 0.01 |
| H3     | 0.09 $\pm$ 0.01                          | 0.13 $\pm$ 0.02 |
| H4     | -                                        | -               |
